# Supplementary material
Source: HighWire-hosted journal article supplement (https://bmjopen.bmj.com/content/9/10/e031486)
Supplement: inline-supplementary-material-2 [file inline-supplementary-material-2.pdf]

**Supplementary Data 2:** Summary of group differences between investigated variables. Highlighted cells represent significant differences in the proportion of respondents per group. Further analysis revealed that differences followed a logical course: patients who had had symptoms for longer or had undergone surgery were more likely to have severe disease. In addition, patients with more severe disease were more likely to have higher limb pain scores.

|                              | N   | Age ( $\pm$ SD) |      | Male (%) |     | Undergone Surgery (%) |     | Length of Symptoms <3yrs (%) |     | mJOA Upper Limb Function <3 |     | mJOA Lower Limb Function <4 |     | mJOA Upper Limb Sensation <2 |     | mJOA Bladder Function <2 |     | Mean VAS Limb Pain <3 |     |
|------------------------------|-----|-----------------|------|----------|-----|-----------------------|-----|------------------------------|-----|-----------------------------|-----|-----------------------------|-----|------------------------------|-----|--------------------------|-----|-----------------------|-----|
| Gender, Male                 | 140 | 55.8            | 10.3 |          |     | 64                    | 46% | 71                           | 51% | 20                          | 14% | 51                          | 36% | 50                           | 36% | 30                       | 21% | 88                    | 63% |
| Gender, Female               | 341 | 52.8            | 9.5  |          |     | 157                   | 46% | 141                          | 41% | 38                          | 11% | 107                         | 31% | 143                          | 42% | 75                       | 22% | 205                   | 60% |
| Undergone Surgery            |     |                 |      |          |     |                       |     |                              |     |                             |     |                             |     |                              |     |                          |     | 135                   | 61% |
| Not Undergone Surgery        | 221 | 53.1            | 8.7  | 64       | 29% |                       |     | 83                           | 38% | 31                          | 14% | 90                          | 41% | 101                          | 46% | 53                       | 24% | 158                   | 61% |
|                              | 260 | 54              | 10.7 | 74       | 28% |                       |     | 129                          | 50% | 27                          | 10% | 68                          | 26% | 92                           | 35% | 53                       | 20% |                       |     |
| mJOA Upper Limb Function <3  | 58  | 56.7            | 9.3  | 19       | 33% | 31                    | 53% | 13                           | 22% |                             |     | 46                          | 79% | 52                           | 90% | 29                       | 50% | 21                    | 36% |
| mJOA Upper Limb Function >3  | 423 | 53.2            | 9.8  | 119      | 28% | 190                   | 45% | 199                          | 47% |                             |     | 112                         | 26% | 141                          | 33% | 76                       | 18% | 272                   | 64% |
| mJOA Lower Limb Function <4  | 158 | 55.4            | 10.1 | 50       | 32% | 90                    | 57% | 51                           | 32% | 46                          | 29% |                             |     | 91                           | 58% | 61                       | 39% | 85                    | 54% |
| mJOA Lower Limb Function >4  | 323 | 52.7            | 9.5  | 88       | 27% | 131                   | 41% | 161                          | 50% | 12                          | 4%  |                             |     | 102                          | 32% | 44                       | 14% | 208                   | 64% |
| mJOA Upper Limb Sensation <2 | 193 | 53.7            | 9.1  | 48       | 25% | 101                   | 52% | 78                           | 40% | 52                          | 27% | 91                          | 47% |                              |     | 67                       | 35% | 86                    | 45% |
| mJOA Upper Limb Sensation >2 | 288 | 53.3            | 10.3 | 90       | 31% | 120                   | 42% | 134                          | 47% | 6                           | 2%  | 67                          | 23% |                              |     | 38                       | 13% | 207                   | 72% |
| mJOA Bladder Function <2     | 105 | 54              | 9.6  | 29       | 28% | 53                    | 50% | 40                           | 38% | 29                          | 28% | 61                          | 58% | 67                           | 64% |                          |     | 58                    | 55% |
| mJOA Bladder Function >2     | 376 | 53.5            | 9.9  | 109      | 29% | 168                   | 45% | 172                          | 46% | 29                          | 8%  | 97                          | 26% | 126                          | 34% |                          |     | 235                   | 63% |
| Length of Symptoms <3 years  | 212 | 52.8            | 10.8 | 71       | 33% | 83                    | 39% |                              |     | 13                          | 6%  | 51                          | 24% | 78                           | 37% | 40                       | 19% | 136                   | 64% |
| Length of Symptoms >3 years  | 269 | 54.2            | 8.9  | 67       | 25% | 138                   | 51% |                              |     | 45                          | 17% | 107                         | 40% | 115                          | 43% | 65                       | 24% | 157                   | 58% |
| Best Limb Pain VAS <3        | 293 | 53.3            | 11   | 88       | 30% | 135                   | 46% | 136                          | 46% | 21                          | 7%  | 85                          | 29% | 86                           | 29% | 58                       | 20% |                       |     |
| Best Limb Pain VAS >3        | 188 | 53.6            | 8.6  | 52       | 28% | 86                    | 46% | 76                           | 40% | 37                          | 20% | 73                          | 39% | 107                          | 57% | 47                       | 25% |                       |     |
